# Supplementary material
Source: PubMed Central journal article supplement (PMC5421625)
Supplement: NIHMS840039-supplement-1.pdf [file NIHMS840039-supplement-1.pdf]

**Supplementary Appendix for “Tumor-infiltrating Merkel cell polyomavirus-specific T cells are diverse & associated with improved survival of Merkel cell carcinoma patients”, by Miller et al.**

**Table of Contents to the Supplementary Appendix:**

|                                                                                                                                      |           |
|--------------------------------------------------------------------------------------------------------------------------------------|-----------|
| <b>I. SUPPLEMENTARY FIGURES.....</b>                                                                                                 | <b>2</b>  |
| <b>Figure S1.</b> KLL-specific TCR diversity in PBMC is not correlated with the magnitude of KLL-specific responses .....            | <b>2</b>  |
| <b>Figure S2.</b> Clonality of KLL-specific T cell repertoire in PBMC of MCC patients does not correlate with disease outcome .....  | <b>3</b>  |
| <b>Figure S3.</b> T cell infiltrate of tumor samples characterized by TCR repertoire and IHC .....                                   | <b>4</b>  |
| <b>Figure S4.</b> Clonality of the T cell repertoire within tumors of MCC patients does not correlate with disease outcome.....      | <b>6</b>  |
| <b>Figure S5.</b> Percentage and number of KLL-specific clonotypes amid tumors...                                                    | <b>7</b>  |
| <b>II. SUPPLEMENTARY TABLES.....</b>                                                                                                 | <b>8</b>  |
| <b>Table S1.</b> Homologs to the CT15-23 (KLEIAPNC) epitope from other polyomaviruses .....                                          | <b>8</b>  |
| <b>Table S2.</b> Characteristics of MCC Patients with A*02/KLL Tetramer+T cells....                                                  | <b>9</b>  |
| <b>Table S3.</b> List of all TCR $\beta$ clonotypes resolved from HLA-A*02:01/KLL-tetramer sorted T cells, annotated by patient..... | <b>10</b> |

## I. SUPPLEMENTAL FIGURES

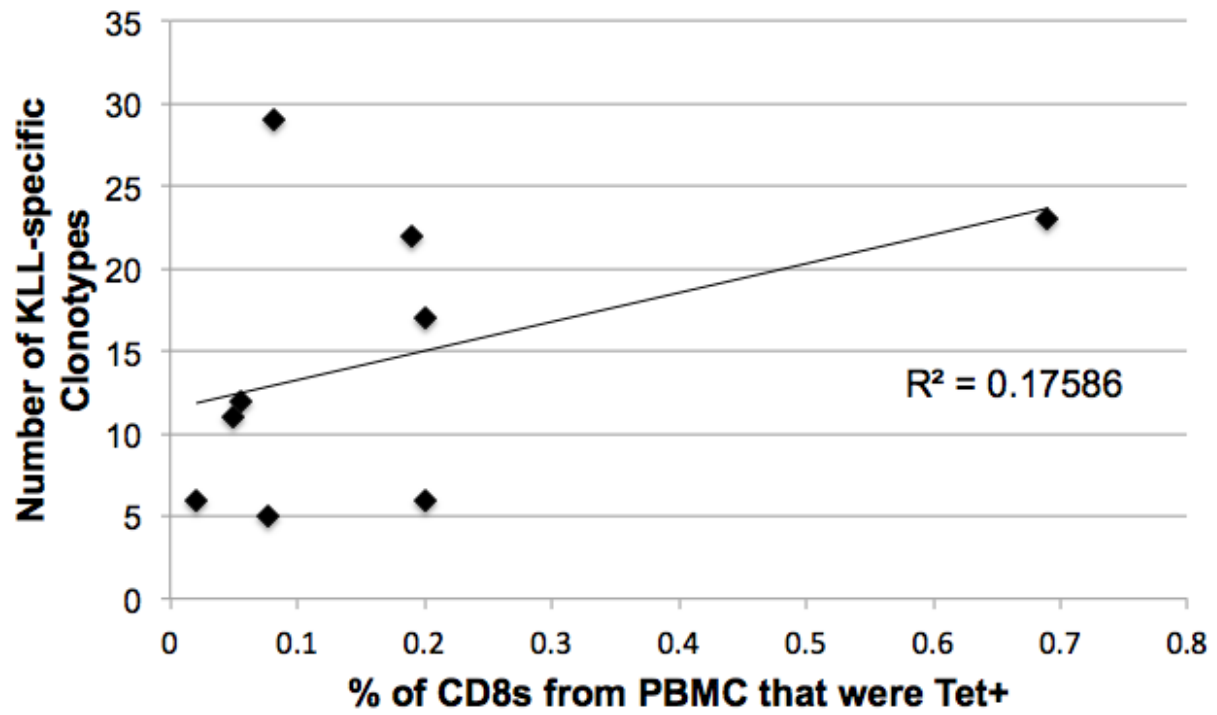

**Figure S1: KLL-specific TCR diversity in PBMC is not correlated with the magnitude of KLL-specific responses.** Number of unique clonotypes (present at  $\geq 2$  estimated number of genomes in each sample) was plotted against % of CD8+ cells positive for KLL-tetramer staining. No significant correlation was found ( $r^2 = 0.17$ ).

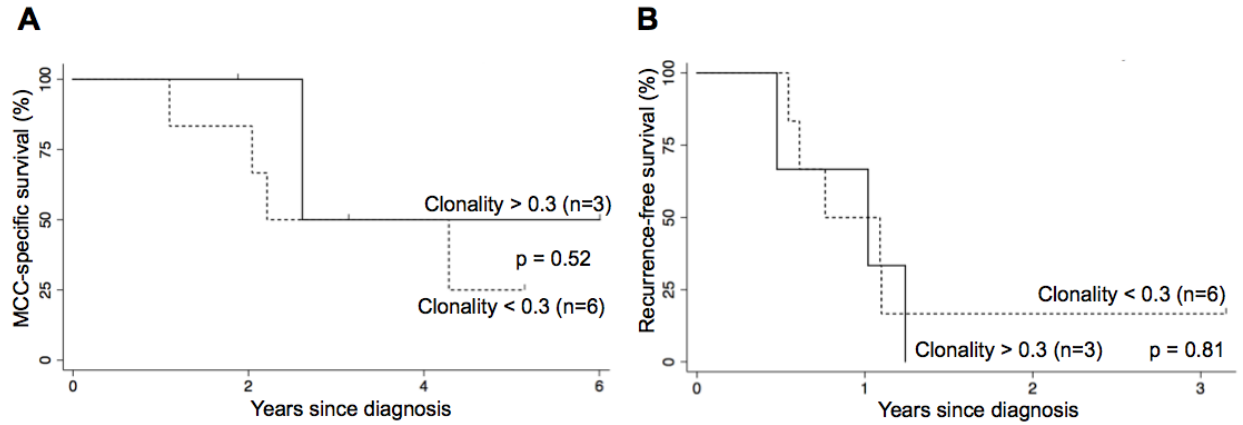

**Figure S2: Clonality of KLL-specific T cell repertoire in PBMC of MCC patients does not correlate with disease outcome.** Clonality of the KLL-specific repertoire from PBMC was calculated and patients were binned by high (>0.3, n=3) or low (<0.3, n=6) clonality. MCC-specific survival (**A**) or recurrence-free survival (**B**) between the two groups of patients were not significantly different by univariate analysis (p=0.52 or p=0.81 by log-rank test).

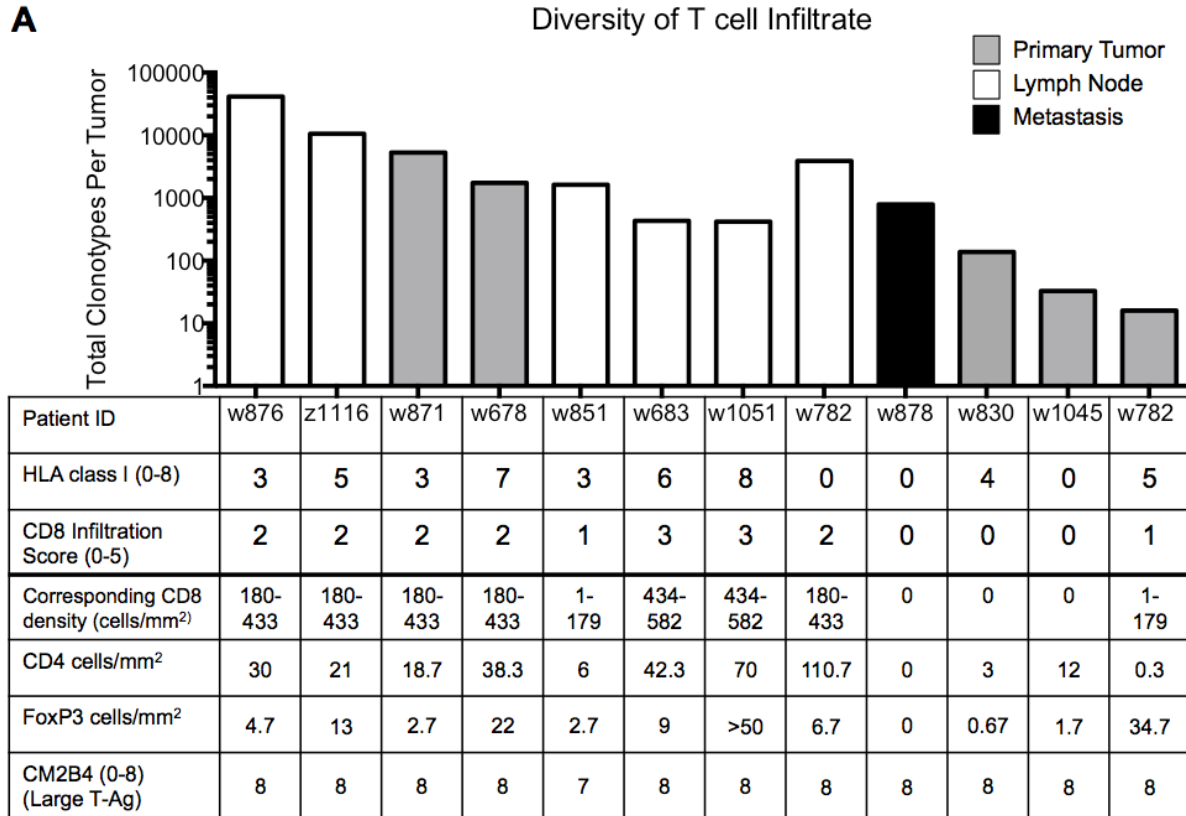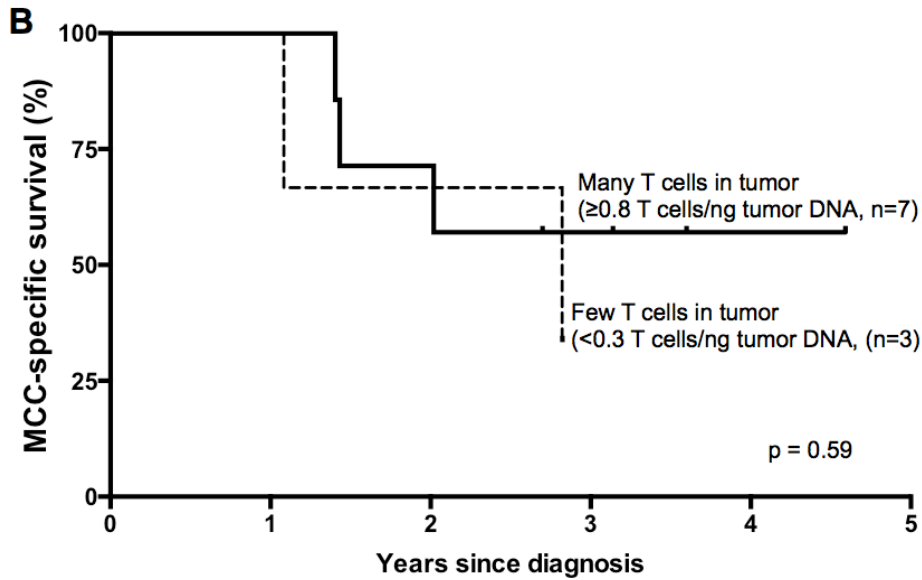

**Figure S3: T cell infiltrate of tumor samples characterized by TCR repertoire and IHC. (A)** Tumors from 9 patients were analyzed for TCR $\beta$  repertoire and stained for HLA-I, CD8, CD4, and FoxP3. Due to low DNA yield from patient w782's primary

tumor, the patient's nodal recurrence was also characterized. Tumor samples contained between 16 and 41,645 unique productive TCRB reads. Intratumoral CD8+ infiltration was categorized on a 0-5 scale as previously described (1), with corresponding range of CD8+ cells/mm<sup>2</sup> below based on the scale from the same reference. CD4+ and FoxP3+ cells were scored directly as cells/mm<sup>2</sup>. CD8+ cells infiltrated tumors more frequently than CD4+ or FoxP3+ cells in most tumors, suggesting that most TCRs are likely from CD8+ T cells. CM2B4 IHC (anti MCPyV Large T-Ag) was scored using the Allred system. Primary tumors = grey bars; lymph nodes = white; metastasis = black. **(B)** The density of T cells within each sample was normalized by dividing the number of T cells (per normalized sequencing) by the total amount of genomic DNA in each sample, per Adaptive Biotechnologies ImmunoSeq platform. Patients were separated *a priori* into those with many T cells ( $\geq 0.8$  T cells/ng tumor DNA, n=7) or few T cells ( $< 0.3$  T cells/ng tumor DNA, n=3). There is no survival difference among patients based on their general immune infiltrate (p=0.59 by log-rank test).

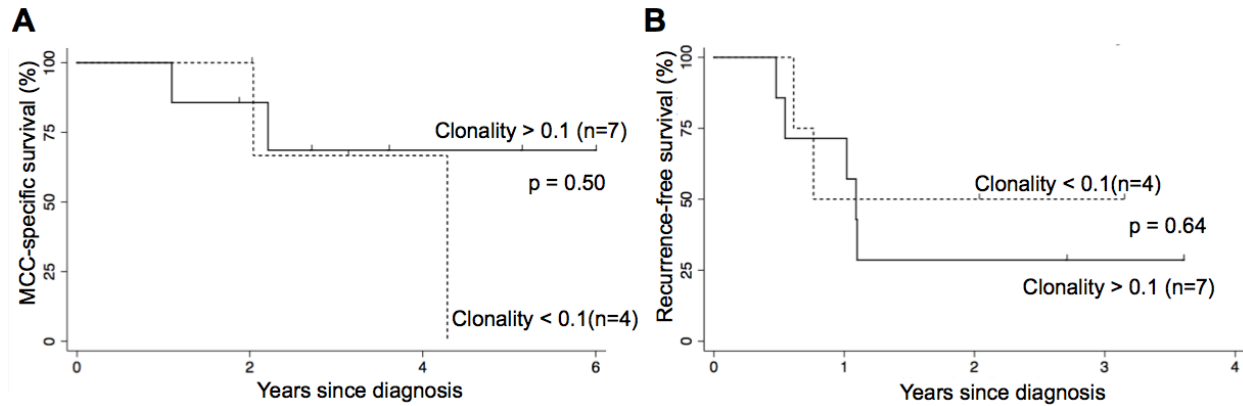

**Figure S4: Clonality of the T cell repertoire within tumors of MCC patients does not correlate with disease outcome.** Patients were binned by whether their tumors had high (>0.1, n=6) or low (<0.1, n=3) clonality. MCC-specific survival **(A)** or recurrence-free survival **(B)** between the two groups of patients was not significantly different by univariate analysis (p=0.50 or p=0.64 by log-rank test).

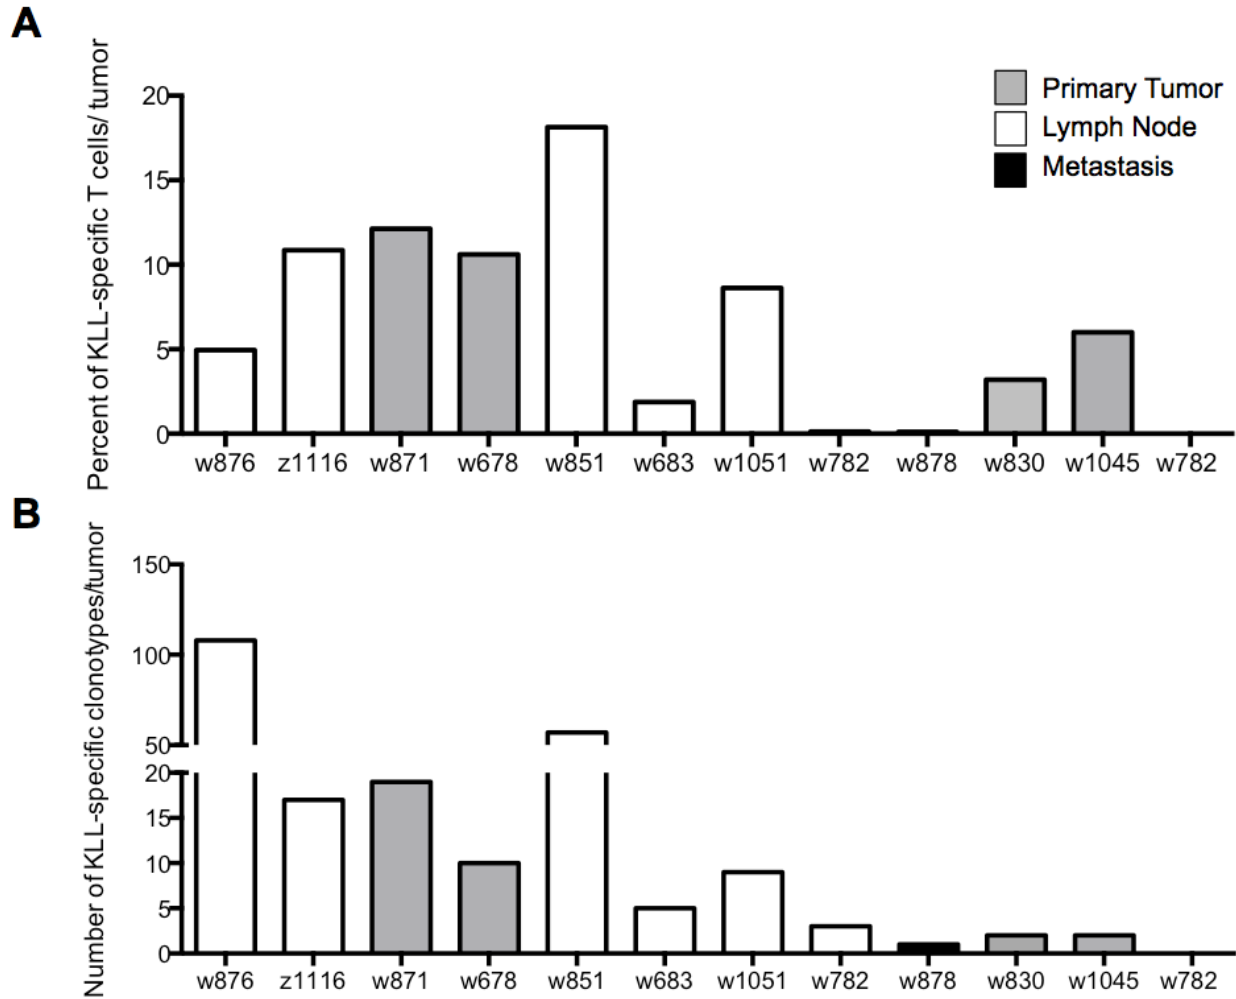

**Figure S5: Percentage and number of KLL-specific clonotypes amid tumors. (A)** KLL-specific T cells constituted between 0-18% of the T cell repertoire of each tumor based on number of genomes sequenced. **(B)** Tumors contained between 0-108 unique KLL-specific clonotypes.

## II. SUPPLEMENTAL TABLES

**Table S1:** Homologs to the CT15-23 (KLLEIAPNC) epitope from other polyomaviruses

| T-Ag aa #    | 15       | 16       | 17       | 18       | 19       | 20       | 21       | 22       | 23       |  | IC <sub>50</sub> binding to HLA A*02 (nM) |
|--------------|----------|----------|----------|----------|----------|----------|----------|----------|----------|--|-------------------------------------------|
| VIRUS        |          |          |          |          |          |          |          |          |          |  |                                           |
| <b>MCPyV</b> | <b>K</b> | <b>L</b> | <b>L</b> | <b>E</b> | <b>I</b> | <b>A</b> | <b>P</b> | <b>N</b> | <b>C</b> |  | <b>299</b>                                |
| BKV          | D        | L        | L        | G        | L        | E        | R        | A        | A        |  | 19316                                     |
| JCV          | D        | L        | L        | G        | L        | D        | R        | S        | A        |  | 19439                                     |
| KIV          | Q        | L        | L        | C        | L        | D        | M        | S        | C        |  | 6950                                      |
| WUV          | Q        | L        | L        | G        | L        | D        | M        | T        | C        |  | 7444                                      |
| SV40         | D        | L        | L        | G        | L        | E        | R        | S        | A        |  | 19586                                     |
| HPyV6        | D        | L        | I        | G        | L        | S        | M        | A        | C        |  | 19258                                     |
| HPyV7        | E        | L        | I        | G        | L        | N        | M        | A        | C        |  | 15594                                     |
| TSV          | D        | L        | L        | Q        | I        | P        | R        | H        | C        |  | 25799                                     |

Residues in grey boxes are highly divergent. While putative HLA 'anchor residues' 2 and 9 are conserved and may permit presentation of homologs by HLA-A\*02, differences in TCR contact residues (middle of peptide) may be sufficient to reduce binding of homologs by MCPyV CT15-23 specific T cells. Homologs are much less likely to bind to human HLA-A\*0201, based on IC<sub>50</sub> values calculated via ANN using the online Immune Epitope Database Analysis Resource binding prediction tool.



**Table S2:** Characteristics of MCC Patients with A\*02/KLL Tetramer+ T cells

| Pt ID | Stage at Dx | Gender | Primary Site | Survival Status | Recurrence      | Age at Dx | Tetramer+ Samples | Tetramer+ % of CD8s |
|-------|-------------|--------|--------------|-----------------|-----------------|-----------|-------------------|---------------------|
| w678  | IIA         | male   | lower limb   | alive           | Local & Distant | 64        | PBMC              | 0.08                |
|       |             |        |              |                 |                 |           | TIL               | <0.01*              |
| w683  | IIA         | male   | lower limb   | alive           | LN & Distant    | 66        | PBMC              | 0.69                |
| w750  | IIA         | female | buttock      | deceased        | LN & Distant    | 58        | PBMC              | 0.19                |
| w782  | IIIA        | male   | upper limb   | deceased        | Local & Distant | 74        | PBMC              | 0.05                |
| w830  | IIIA        | male   | head & neck  | deceased        | Local & Distant | 58        | PBMC              | 0.20                |
| w851  | IIIB        | female | unknown      | alive (NED)     | No              | 77        | PBMC              | <0.01*              |
|       |             |        |              |                 |                 |           | TIL               | 0.16                |
| w871  | IA          | male   | buttock      | alive (NED)     | No              | 53        | PBMC              | <0.01*              |
|       |             |        |              |                 |                 |           | TIL               | 0.17                |
| w876  | IIIB        | male   | unknown      | alive (NED)     | No              | 50        | PBMC              | 0.08                |
|       |             |        |              |                 |                 |           | TIL               | 7.98                |
| w878  | IV          | female | unknown      | deceased        | N/A             | 54        | PBMC              | 0.06                |
|       |             |        |              |                 |                 |           | TIL               | <0.01*              |
| w1045 | IIIA        | female | head & neck  | deceased        | Distant         | 70        | PBMC              | 0.02                |
| w1051 | IIIB        | male   | unknown      | alive (NED)     | No              | 70        | PBMC              | <0.01*              |
|       |             |        |              |                 |                 |           | TIL               | 0.43                |
| z1116 | IIIB        | male   | unknown      | alive           | Distant         | 67        | PBMC              | 0.2                 |
|       |             |        |              |                 |                 |           | TIL               | 1.04                |

Abbreviations: MCC, Merkel cell carcinoma; Pt, patient; Dx, diagnosis; NED, no evidence of disease; LN, lymph node; TIL, tumor infiltrating lymphocytes. \* denotes samples that had insufficient tetramer+ T cells for further analysis. TIL samples were unavailable for 5 of the 12 patients.

**Table S3:** List of all TCR $\beta$  clonotypes resolved from HLA-A\*02:01/KLL-tetramer sorted T cells, annotated by patient

| CDR3              | TCRBV allele  | TCRBJ allele  | CDR3                | TCRBV allele  | TCRBJ allele  |
|-------------------|---------------|---------------|---------------------|---------------|---------------|
| <b>w678</b>       |               |               | <b>w782 cont'd</b>  |               |               |
| CAIRQFDANTGELFF   | TCRBV10-03*01 | TCRBJ02-02*01 | CASSPPSSGNTIYF      | TCRBV18-01*01 | TCRBJ01-03*01 |
| CASSIIAGSSYNEQFF  | TCRBV19-01    | TCRBJ02-01*01 | CASSVRVQQRKNIQYF    | TCRBV21-01*01 | TCRBJ02-04*01 |
| CASSSGNPSTDTQYF   | TCRBV10-02*01 | TCRBJ02-03*01 | CAIRTLDMNTGELFF     | TCRBV10-03*01 | TCRBJ02-02*01 |
| CASSGGLLHVLDEQYF  | TCRBV21-01*01 | TCRBJ02-07*01 | CSARPGQGAYNSPLHF    | TCRBV20       | TCRBJ01-06*01 |
| CATTWRRYYEQYF     | TCRBV06-07*01 | TCRBJ02-07*01 | CASSLYREETQYF       | TCRBV07-07*01 | TCRBJ02-05*01 |
| <b>w683</b>       |               |               | <b>w830</b>         |               |               |
| CASRSQNYGYTF*     | TCRBV06-05*01 | TCRBJ01-02*01 | CASSIMLYSNQPQHF     | TCRBV19-01    | TCRBJ01-05*01 |
| CASSILLVIATNEKLFF | TCRBV19-01    | TCRBJ01-04*01 | CAIRARDQNTGELFF     | TCRBV10-03*01 | TCRBJ02-02*01 |
| CASRSQNYGYTF*     | TCRBV06-06    | TCRBJ01-02*01 | CASSILGASNQPQHF*    | TCRBV19-01    | TCRBJ01-05*01 |
| CASRSQNYGYTF*     | TCRBV06-01*01 | TCRBJ01-02*01 | CASSLAGFRFF         | TCRBV12       | TCRBJ02-01*01 |
| CASRSQNYGYTF*     | TCRBV06       | TCRBJ01-02*01 | CASLTGLAGTDTQYF     | TCRBV07-03*01 | TCRBJ02-03*01 |
| CASRSQNYGYTF*     | TCRBV06       | TCRBJ02-02*01 | CAIRKQDQNTGELFF     | TCRBV10-03*01 | TCRBJ02-02*01 |
| CASSRALATARKNIQYF | TCRBV21-01*01 | TCRBJ02-04*01 | CASSFPGAGSNTGELFF   | TCRBV28-01*01 | TCRBJ02-02*01 |
| CASSLMLQQRKNIQYF  | TCRBV21-01*01 | TCRBJ02-04*01 | CASSLVIATQIRTEAFF   | TCRBV21-01*01 | TCRBJ01-01*01 |
| CASRSQNYGYTF*     | TCRBV06-08*01 | TCRBJ01-02*01 | CASSILGASNQPQHF*    | TCRBV19-01    | TCRBJ01-05*01 |
| CASRSQNYGYTF*     | TCRBV06-09*01 | TCRBJ01-02*01 | CASRGLLAQQSRANVLTF  | TCRBV21-01*01 | TCRBJ02-06*01 |
| CASRSQNYGYTF*     | TCRBV06-07*01 | TCRBJ01-02*01 | CASRHWLLQHARNTIYF   | TCRBV21-01*01 | TCRBJ01-03*01 |
| CASRSQNYGYTF*     | TCRBV06-04    | TCRBJ01-02*01 | CASSNPQRIQQSRANVLTF | TCRBV10-01    | TCRBJ02-06*01 |
| CASRSQNYGYTF*     | TCRBV06       | TCRBJ01-02*01 | CPGSRYGSEQQSRANVLTF | TCRBV22-01*01 | TCRBJ02-06*01 |
| CASSSQNYGYTF      | TCRBV06-05*01 | TCRBJ01-02*01 | CASSILLYSNQPQHF     | TCRBV19-01    | TCRBJ01-05*01 |
| CASSVALLQHARNTIYF | TCRBV21-01*01 | TCRBJ01-03*01 | CASSWSVLQHARNTIYF   | TCRBV21-01*01 | TCRBJ01-03*01 |
| CASRAKLATLRTEAFF  | TCRBV21-01*01 | TCRBJ01-01*01 | CASSLGGWDTEAFF      | TCRBV12       | TCRBJ01-01*01 |
| CASRSQNYGYTF*     | TCRBV10-03*01 | TCRBJ01-02*01 | CASLTGLAGTDTQYF     | TCRBV07-03*01 | TCRBJ02-03*01 |
| CASRSQNYGYTF*     | TCRBV06       | TCRBJ01-02*01 |                     |               |               |
| CASRSQNYGYTF*     | TCRBV06       | TCRBJ01-02*01 | <b>w851</b>         |               |               |
| CASKTGGREKLFF     | TCRBV28-01*01 | TCRBJ01-04*01 | CASSILSNSYNEQFF     | TCRBV19-01    | TCRBJ02-01*01 |
| CASKLDRPAPNSPLHF  | TCRBV03       | TCRBJ01-06*01 | CASRRAPGGGLYNEQFF   | TCRBV03       | TCRBJ02-01*01 |
| CASSFLRGADYGYTF   | TCRBV25-01*01 | TCRBJ01-02*01 | CAIRTLDMNTGELFF     | TCRBV10-03*01 | TCRBJ02-02*01 |
| CASSLVGGRDEQYF    | TCRBV09-01    | TCRBJ02-07*01 | CASSLSRGLLNGYTF     | TCRBV27-01*01 | TCRBJ01-02*01 |
|                   |               |               | CASSLVGGRDGYTF      | TCRBV12       | TCRBJ01-02*01 |
| <b>w750</b>       |               |               | CASSQFWAGGIYEQYF    | TCRBV03       | TCRBJ02-07*01 |
| CAIRDSNTGELFF     | TCRBV10-03*01 | TCRBJ02-02*01 | CASSQVGETQYF        | TCRBV04-01*01 | TCRBJ02-05*01 |
| CAIRDLLAGTNTGELFF | TCRBV20       | TCRBJ02-02*01 | CASSYQGEETQYF       | TCRBV06-05*01 | TCRBJ02-05*01 |
| CAIRLADQNTGELFF   | TCRBV10-03*01 | TCRBJ02-02*01 | CATSSDRGGGLQETQYF   | TCRBV15-01*01 | TCRBJ02-05*01 |
| CASRDIGSGPQHF     | TCRBV10-02*01 | TCRBJ01-05*01 | CASRHNVLQHARNTIYF   | TCRBV21-01*01 | TCRBJ01-03*01 |
| CASRDQNTGELFF     | TCRBV10-03*01 | TCRBJ02-02*01 | CASSGRLQQSRANVLTF   | TCRBV21-01*01 | TCRBJ02-06*01 |
| CAIRIRDQNTGELFF   | TCRBV10-03*01 | TCRBJ02-02*01 | CASSYPYGGQNEQFF     | TCRBV06-05*01 | TCRBJ02-01*01 |
| CASRTIFATVMQDTQYF | TCRBV21-01*01 | TCRBJ02-03*01 | CARGPTGGGYTF        | TCRBV02-01*01 | TCRBJ01-02*01 |
| CAIRTRDQNTGELFF   | TCRBV10-03*01 | TCRBJ02-02*01 | CASSPRAGVDYGYTF     | TCRBV18-01*01 | TCRBJ01-02*01 |
| CASSRLQQRKNIQYF   | TCRBV21-01*01 | TCRBJ02-04*01 | CASSLVRDSYNEQFF     | TCRBV07-02*01 | TCRBJ02-01*01 |
| CASSIMVYSYNEQFF   | TCRBV19-01    | TCRBJ02-01*01 | CASSGGRVNEKLFF      | TCRBV19-01    | TCRBJ01-04*01 |
| CAIREGDQNTGELFF   | TCRBV10-03*01 | TCRBJ02-02*01 | CASSLGGNTGELFF      | TCRBV27-01*01 | TCRBJ02-02*01 |
| CASSDFNPSTDTQYF   | TCRBV06-01*01 | TCRBJ02-03*01 | CASSEWGGTQPQHF      | TCRBV06-01*01 | TCRBJ01-05*01 |
| CASSRGSVDEQYF     | TCRBV19-01    | TCRBJ02-07*01 | CATSGTGRWETQYF      | TCRBV15-01*01 | TCRBJ02-05*01 |
| CASSDRDLYGYTF     | TCRBV19-01    | TCRBJ01-02*01 | CASSLARGPGNTIYF     | TCRBV07-06*01 | TCRBJ01-03*01 |
| CASSIAAGDAYGYTF   | TCRBV19-01    | TCRBJ01-02*01 | CASRITMGQPQHF       | TCRBV19-01    | TCRBJ01-05*01 |
| CASSPRGDTEAFF     | TCRBV10-01    | TCRBJ01-01*01 | CASSDRVAGNEQFF      | TCRBV06-05*01 | TCRBJ02-01*01 |
| CASSFGSEQYF       | TCRBV05-04*01 | TCRBJ02-07*01 | CASSLTSGVTEAFF      | TCRBV07-09    | TCRBJ01-01*01 |
| CASSWELTNEQYF     | TCRBV05-04*01 | TCRBJ02-07*01 | CASSLSPELHGYTF      | TCRBV27-01*01 | TCRBJ01-02*01 |
| CASNRGSTQSRANVLTF | TCRBV05-02*01 | TCRBJ02-06*01 | CATSRDSGGLDGDTQYF   | TCRBV15-01*01 | TCRBJ02-03*01 |
| CASSWRVQPQHF      | TCRBV28-01*01 | TCRBJ01-05*01 | CASSPGEWGGSETQYF    | TCRBV03       | TCRBJ02-05*01 |
| CASSQSIADNYGYTF   | TCRBV16-01    | TCRBJ01-02*01 | CASSFGGGANEQFF      | TCRBV13-01*01 | TCRBJ02-01*01 |
| CASSLSGQPQHF      | TCRBV27-01*01 | TCRBJ01-05*01 | CASTPGGLPKNIQYF     | TCRBV11-01*01 | TCRBJ02-04*01 |
|                   |               |               | CASATGTGDLEQFF      | TCRBV07-02*01 | TCRBJ02-01*01 |
| <b>w782</b>       |               |               | CASSWGYDSYNEQFF     | TCRBV05-06*01 | TCRBJ02-01*01 |
| CASSILGYSNQPQHF   | TCRBV19-01    | TCRBJ01-05*01 | CASSQETGEGNSPLHF    | TCRBV04-02*01 | TCRBJ01-06*01 |
| CAIRDSNTGELFF     | TCRBV10-03*01 | TCRBJ02-02*01 | CASRLTDRGRVGEKLFF   | TCRBV07-09    | TCRBJ01-04*01 |
| CAIRAGDSNTGELFF   | TCRBV10-03*01 | TCRBJ02-02*01 | CASSILSNSYNEQFF     | TCRBV19-01    | TCRBJ02-01*01 |
| CASREGAAYNEQFF**  | TCRBV06-01*01 | TCRBJ02-01*01 | CASSAGTAAGNTIYF     | TCRBV07-06*01 | TCRBJ01-03*01 |
| CASREGAAYNEQFF**  | TCRBV06       | TCRBJ02-01*01 | CASSGVKRSRANVLTF    | TCRBV10-01    | TCRBJ02-06*01 |
| CATSDPLAASYEQYF   | TCRBV24       | TCRBJ02-07*01 | CASSGYHDGFSEQYF     | TCRBV06-01*01 | TCRBJ02-07*01 |

| CDR3                | TCRBV allele  | TCRBJ allele  | CDR3                      | TCRBV allele  | TCRBJ allele  |
|---------------------|---------------|---------------|---------------------------|---------------|---------------|
| <b>w851 cont'd</b>  |               |               | <b>w876 (PBMC) cont'd</b> |               |               |
| CASSLQGAGQPQHF      | TCRBV19-01    | TCRBJ01-05*01 | CASRGDIGYRKTYGYTF         | TCRBV21-01*01 | TCRBJ01-02*01 |
| CADGRGDQYF          | TCRBV02-01*01 | TCRBJ02-07*01 | CASSILSSSNQPQHF           | TCRBV19-01    | TCRBJ01-05*01 |
| CASSPVGGDQPQHF      | TCRBV07-09    | TCRBJ01-05*01 | CASTLGNPSTDTQYF           | TCRBV06-06    | TCRBJ02-03*01 |
| CASSIGRTYYGYTF      | TCRBV19-01    | TCRBJ01-02*01 | CASSSGTSGGLNYNEQFF        | TCRBV13-01*01 | TCRBJ02-01*01 |
| CAYGAGGPNTEAFF      | TCRBV05-08*01 | TCRBJ01-01*01 | CASSSGTSGGLTYNEQFF        | TCRBV13-01*01 | TCRBJ02-01*01 |
| CASNIYSQPQHF        | TCRBV19-01    | TCRBJ01-05*01 | CASSTLSGTHNEQFF           | TCRBV19-01    | TCRBJ02-01*01 |
| CASSELDGTEAFF       | TCRBV05-05*01 | TCRBJ01-01*01 | CASSAEVTNHQSRANVLTF       | TCRBV19-01    | TCRBJ02-06*01 |
| CASSETDRGLAYEQYV    | TCRBV06-01*01 | TCRBJ02-07*01 | CASDTPDLNTEAFF*           | TCRBV06       | TCRBJ01-01*01 |
| CSARDRVGNTIYF       | TCRBV20       | TCRBJ01-03*01 | CASSYSTGVPEKLF            | TCRBV06-05*01 | TCRBJ01-04*01 |
| CASSYFPGVEAFF       | TCRBV06-05*01 | TCRBJ01-01*01 |                           |               |               |
| CASSEGGQNSPLHF      | TCRBV09-01    | TCRBJ01-06*01 | <b>w876 (TIL)</b>         |               |               |
| CASQTFYNEQFF        | TCRBV06-05*01 | TCRBJ02-01*01 | CASSVLNTGELFF*            | TCRBV10-02*01 | TCRBJ02-02*01 |
| CASKTSGFPDTQYF      | TCRBV02-01*01 | TCRBJ02-03*01 | CAIRAGASYNEQFF*           | TCRBV28-01*01 | TCRBJ02-01*01 |
| CASSLSRGDNSNPQHF    | TCRBV27-01*01 | TCRBJ01-05*01 | CASRGQNTGELFF*            | TCRBV10-03*01 | TCRBJ02-02*01 |
| CASRESNTEAFF        | TCRBV27-01*01 | TCRBJ01-01*01 | CAIHEGDSNTGELFF*          | TCRBV10-03*01 | TCRBJ02-02*01 |
| CASSEGGQSYEQYF      | TCRBV05-06*01 | TCRBJ02-07*01 | CAISARDQNTGELFF*          | TCRBV10-03*01 | TCRBJ02-02*01 |
| CASSSGTPSTDTQYF     | TCRBV06-06    | TCRBJ02-03*01 | CAIRRQDQNTGELFF*          | TCRBV10-03*01 | TCRBJ02-02*01 |
| CASRPDIPLGETQYF     | TCRBV06-05*01 | TCRBJ02-05*01 | CAIRGQDQNTGELFF*          | TCRBV10-03*01 | TCRBJ02-02*01 |
| CASSILSNSYNEQFF     | TCRBV19-01    | TCRBJ02-01*01 | CATRDINTGELFF*            | TCRBV10-03*01 | TCRBJ02-02*01 |
| CASKKLDRLPAPNSPLHF  | TCRBV03       | TCRBJ01-06*01 | CASSQLRTGDEYEQYF          | TCRBV16-01    | TCRBJ02-07*01 |
| CASRRAPGGGLYNEQFS   | TCRBV03       | TCRBJ02       | CASDTPDLNTEAFF*           | TCRBV06-01*01 | TCRBJ01-01*01 |
| CASSYQGEETQYF       | TCRBV06       | TCRBJ02-05*01 | CASSFGSGTKDTQYF*          | TCRBV12       | TCRBJ02-03*01 |
|                     |               |               | CAS SSRTKAYEQYF           | TCRBV13-01*01 | TCRBJ02-07*01 |
| <b>w871</b>         |               |               | CASSLIAGLSYEQYF           | TCRBV07-08*01 | TCRBJ02-07*01 |
| CASSSGTPSTDTQYF     | TCRBV06-06    | TCRBJ02-03*01 | CASSLAGLAGTDTQYF          | TCRBV07-02*01 | TCRBJ02-03*01 |
| CAINNRDQNTGELFF     | TCRBV10-03*01 | TCRBJ02-02*01 | CASTLGNPSTDTQYF*          | TCRBV06-06    | TCRBJ02-03*01 |
| CASTQSNTGELFF       | TCRBV10-02*01 | TCRBJ02-02*01 | CASSGQNTGELFF*            | TCRBV10-02*01 | TCRBJ02-02*01 |
| CASSETPDMNTEAFF     | TCRBV06-01*01 | TCRBJ01-01*01 | CASSVEDYTGELFF*           | TCRBV09-01    | TCRBJ02-02*01 |
| CASSSGTPSTDTQYF*    | TCRBV06-05*01 | TCRBJ02-03*01 | CASSIQLFVRTEAFF*          | TCRBV19-01    | TCRBJ01-01*01 |
| CASSSGTPSTDTQYF*    | TCRBV06       | TCRBJ02-03*01 | CASRASNTYGYTF*            | TCRBV06-05*01 | TCRBJ01-02*01 |
| CASTDSNTGELFF       | TCRBV10-02*01 | TCRBJ02-02*01 | CASSIAYSNQPQHF            | TCRBV19-01    | TCRBJ01-05*01 |
| CASSSGTPSTDTQYF*    | TCRBV06-05*01 | TCRBJ02-03*01 | CASRSQAVLNEQFF            | TCRBV19-01    | TCRBJ02-01*01 |
| CASSSGTPSTDTQYF*    | TCRBV06-09*01 | TCRBJ02-03*01 | CASSTLSGTHNEQFF           | TCRBV19-01    | TCRBJ02-01*01 |
| CASSSGTPSTDTQYF*    | TCRBV06-09*01 | TCRBJ02-03*01 | CASSILSSSNQPQHF           | TCRBV19-01    | TCRBJ01-05*01 |
| CASSLGAVAGSSYNEQFF  | TCRBV13-01*01 | TCRBJ02-01*01 | CASSLAGDRYF               | TCRBV12       | TCRBJ01-06*01 |
| CASSYSTGVPEKLF      | TCRBV06-05*01 | TCRBJ01-04*01 | CCASSFGTSGGTTYNEQFF*      | TCRBV13-01*01 | TCRBJ02-01*01 |
| CASSWYLATHSDNEQFF   | TCRBV21-01*01 | TCRBJ02-01*01 | CASSPWDEQFF               | TCRBV12       | TCRBJ02-01*01 |
| CASTGGLADTQYF       | TCRBV19-01    | TCRBJ02-03*01 | CASRGSSYNEQFF             | TCRBV28-01*01 | TCRBJ02-01*01 |
| CASSSCMDIYKSRANVLTF | TCRBV18-01*01 | TCRBJ02-06*01 | CASSSGTSGGLTYNEQFF        | TCRBV13-01*01 | TCRBJ02-01*01 |
| CASRRTSGGRTDTQYF    | TCRBV06       | TCRBJ02-03*01 | CASSYQIGLSYEQYF*          | TCRBV06-06    | TCRBJ02-07*01 |
| CASSSGTPSTDTQYF*    | TCRBV06-08*01 | TCRBJ02-03*01 | CASSEFAGQETQYF            | TCRBV02-01*01 | TCRBJ02-05*01 |
| CASSSGTPSTDTQYF*    | TCRBV06-06    | TCRBJ02-03*01 | CASSSGTSGGLNYNEQFF        | TCRBV13-01*01 | TCRBJ02-01*01 |
|                     |               |               | CASSVLNTGELFF*            | TCRBV10-02*01 | TCRBJ02-02*01 |
| <b>w876 (PBMC)</b>  |               |               | CASSVLNTGELFF*            | TCRBV10-03*01 | TCRBJ02-02*01 |
| CASSVLNTGELFF*      | TCRBV10-02*01 | TCRBJ02-02*01 | CAIHEGDSNTGELFF*          | TCRBV10-03*01 | TCRBJ02-02*01 |
| CAIRRQDQNTGELFF     | TCRBV10-03*01 | TCRBJ02-02*01 | CASDTPDLNTEAFF*           | TCRBV06       | TCRBJ01-01*01 |
| CAIHEGDSNTGELFF     | TCRBV10-03*01 | TCRBJ02-02*01 | CAIRRQDQNTGELFF           | TCRBV10-03*01 | TCRBJ02-02*01 |
| CASRGQNTGELFF       | TCRBV10-03*01 | TCRBJ02-02*01 | CASRGQNTGELFF*            | TCRBV10       | TCRBJ02-02*01 |
| CASSQLRTGDEYEQYF    | TCRBV16-01    | TCRBJ02-07*01 | CAIRGQNTGELFF             | TCRBV10-03*01 | TCRBJ02-02*01 |
| CATRDINTGELFF*      | TCRBV10-03*01 | TCRBJ02-02*01 | CASRASNTYGYTF*            | TCRBV06-06    | TCRBJ01-02*01 |
| CAIRAGASYNEQFF      | TCRBV28-01*01 | TCRBJ02-01*01 | CASSSRTKAYEQYF*           | TCRBV13-01*01 | TCRBJ02-07*01 |
| CAISARDQNTGELFF     | TCRBV10-03*01 | TCRBJ02-02*01 | CASDTPDLNTEAFF*           | TCRBV06-09*01 | TCRBJ01-01*01 |
| CASSFGSGTKDTQYF     | TCRBV12       | TCRBJ02-03*01 | CASDTPDLNTEAFF*           | TCRBV06-08*01 | TCRBJ01-01*01 |
| CASRGSIATRYNEKLF    | TCRBV21-01*01 | TCRBJ01-04*01 | CASSVEDYTGELFF*           | TCRBV09-01    | TCRBJ02-02*01 |
| CASDTPDLNTEAFF*     | TCRBV06-01*01 | TCRBJ01-01*01 | CASTLGNPSTDTQYF*          | TCRBV06-05*01 | TCRBJ02-03*01 |
| CASSLAGLAGTDTQYF    | TCRBV07-02*01 | TCRBJ02-03*01 | CASRASNTYGYTF*            | TCRBV06       | TCRBJ01-02*01 |
| CASSSRTKAYEQYF      | TCRBV13-01*01 | TCRBJ02-07*01 | CASRTVVLHWHHQPQHF         | TCRBV21-01*01 | TCRBJ01-05*01 |
| CARTESRQSRANVLTF    | TCRBV07-05*01 | TCRBJ02-06*01 | CAIRTGSAYNEQFF            | TCRBV28-01*01 | TCRBJ02-01*01 |
| CASSVEDYTGELFF*     | TCRBV09-01    | TCRBJ02-02*01 | CAISARDQNTGELFF*          | TCRBV10-03*01 | TCRBJ02-02*01 |
| CASRRREQFF          | TCRBV21-01*01 | TCRBJ02-01*01 | CASDTPDLNTEAFF*           | TCRBV10-03*01 | TCRBJ01-01*01 |
| CASRRVLAYRKTYGYTF   | TCRBV21-01*01 | TCRBJ01-02*01 | CSALPVTGAFQETQYF          | TCRBV20       | TCRBJ02-05*01 |
| CASRRCIATHNSPLHF    | TCRBV21-01*01 | TCRBJ01-06*01 | CASSVLNTGELFF             | TCRBV10-01    | TCRBJ02-02*01 |
| CAISADNCIQSRANVLTF  | TCRBV10-03*01 | TCRBJ02-06*01 | CAIRGQDQNTGELFF*          | TCRBV10-03*01 | TCRBJ02-02*01 |
| CASSGQNTGELFF*      | TCRBV10-02*01 | TCRBJ02-02*01 | CASRASNTYGYTF*            | TCRBV06-01*01 | TCRBJ01-02*01 |

| CDR3                     | TCRBV allele  | TCRBJ allele  | CDR3                     | TCRBV allele  | TCRBJ allele  |
|--------------------------|---------------|---------------|--------------------------|---------------|---------------|
| <b>w876 (TIL) cont'd</b> |               |               | <b>w876 (TIL) cont'd</b> |               |               |
| CASSVLNTGELFF*           | TCRBV10-02*01 | TCRBJ02-02*01 | CASRDINSNGELFF           | TCRBV10-03*01 | TCRBJ02-02*01 |
| CARSVLNTGELFF            | TCRBV10-02*01 | TCRBJ02-02*01 | CASSVLNTGELFF*           | TCRBV10-03*01 | TCRBJ02-02*01 |
| CAIRRQDQNTGELFF*         | TCRBV06-01*01 | TCRBJ02-02*01 | CASTLGNPSTDTQYF*         | TCRBV10-03*01 | TCRBJ02-03*01 |
| CASSVLNTGELFF*           | TCRBV10-02*01 | TCRBJ02-02*01 | CACSVLNTGELFF            | TCRBV10-02*01 | TCRBJ02-02*01 |
| CAIHEGDSNTGELFF*         | TCRBV06-01*01 | TCRBJ02-02*01 | CAIHEGDSNTGELFF*         | TCRBV10-03*01 | TCRBJ02-02*01 |
| CASSVLNTGELFF*           | TCRBV03       | TCRBJ02-02*01 | CAIHEGDSNTGELFF*         | TCRBV10-03*01 | TCRBJ02-02*01 |
| CASSPTGAVSYEQYF          | TCRBV12       | TCRBJ02-07*01 | CAIRAGASYNEQFF*          | TCRBV28-01*01 | TCRBJ02-01*01 |
| CSARAPTGTGNTGELFF        | TCRBV20       | TCRBJ02-02*01 | CAIRAVASYNEQFF           | TCRBV28-01*01 | TCRBJ02-01*01 |
| CATRDINTGELFF*           | TCRBV10       | TCRBJ02-02*01 | CAIRGQDQNTGELFF*         | TCRBV10-03*01 | TCRBJ02-02*01 |
| CAIRRQDQNTGELFF*         | TCRBV10-02*01 | TCRBJ02-02*01 | CAIRRDQDNTGELFF          | TCRBV10-03*01 | TCRBJ02-02*01 |
| CAISARDQNTGELFF*         | TCRBV10-02*01 | TCRBJ02-02*01 | CAIRRQDQNTGELFF          | TCRBV10-03*01 | TCRBJ02-02*01 |
| CASRGQNTGELFF*           | TCRBV10-02*01 | TCRBJ02-02*01 | CASRASNTYGYTF*           | TCRBV10-03*01 | TCRBJ01-02*01 |
| CASRGQNTGELFF*           | unresolved    | TCRBJ02-02*01 | CASRGQDQNTGELFF          | TCRBV10-03*01 | TCRBJ02-02*01 |
| CAIRGQDQNTGELFF*         | TCRBV10-02*01 | TCRBJ02-02*01 | CASSLIAGLSYEQYF*         | TCRBV07-04*01 | TCRBJ02-07*01 |
| CAIRRQDQNTGELFF*         | TCRBV06-06    | TCRBJ02-02*01 | CAIHEGDSNTGELFF*         | TCRBV06-06    | TCRBJ02-02*01 |
| CASSGQNTGELFF*           | TCRBV10-02*01 | TCRBJ02-02*01 | CASSQLRTGDEYEQYF*        | TCRBV16-01    | TCRBJ02-07*01 |
| CAIRGQDQNTGELFF*         | TCRBV06-01*01 | TCRBJ02-02*01 | CASSSRTKAYEQYF*          | TCRBV05-02*01 | TCRBJ02-07*01 |
| CASSSRTKAYEQYF*          | TCRBV02-01*01 | TCRBJ02-07*01 | CAIRRDQDQNTGELFF*        | TCRBV06-05*01 | TCRBJ02-02*01 |
| CASSSRTKAYEQYF*          | TCRBV27-01*01 | TCRBJ02-07*01 | CAIRRQDQNTGELFF*         | unresolved    | TCRBJ02-02*01 |
| CASTLGNPSTDTQYF*         | TCRBV06-09*01 | TCRBJ02-03*01 | CAISARDQNTGELFF*         | TCRBV06-05*01 | TCRBJ02-02*01 |
| CATRDINTGELFF*           | TCRBV10-02*01 | TCRBJ02-02*01 | CAISARDQNTGELFF*         | TCRBV06       | TCRBJ02-02*01 |
| CASSDRPRIAQRANVLT        | TCRBV10-01    | TCRBJ02-06*01 | CAISDTPDLNTEAFF          | TCRBV06-01*01 | TCRBJ01-01*01 |
| CASRRCIATTARNTIYF        | TCRBV21-01*01 | TCRBJ01-03*01 | CANSSRTKAYEQYF           | TCRBV13-01*01 | TCRBJ02-07*01 |
| CASSESNTLVGFF            | TCRBV10-02*01 | TCRBJ02-01*01 | CASRASNTYGYTF*           | TCRBV06-08*01 | TCRBJ01-02*01 |
| CPGRRARKRTSRANVLT        | TCRBV22-01*01 | TCRBJ02-06*01 | CASSDTPDLNTEAFF*         | TCRBV03       | TCRBJ01-01*01 |
| CASSLFSVYTQFF            | TCRBV12       | TCRBJ02-01*01 | CASSDTPDLNTEAFF*         | TCRBV06-01*01 | TCRBJ01-01*01 |
| CASSLGVSGGMTYNEQFF       | TCRBV13-01*01 | TCRBJ02-01*01 | CASSDTPDLNTEAFF*         | TCRBV06-01*01 | TCRBJ01-01*01 |
| CPGSRLGSEQSRANVLT        | TCRBV22-01*01 | TCRBJ02-06*01 | CASSDTPDLNTEAFF*         | TCRBV06-01*01 | TCRBJ01-01*01 |
| CASSVLNTGELFF*           | TCRBV10-01    | TCRBJ02-02*01 | CASSFGSGTKDTQYF*         | TCRBV03       | TCRBJ02-03*01 |
| CASSVLNTGELFF*           | TCRBV10-02*01 | TCRBJ02-02*01 | CASSFGSGTKDTQYF*         | TCRBV03       | TCRBJ02-03*01 |
| CAIRGQDQNTGELFF*         | TCRBV06-05*01 | TCRBJ02-02*01 | CASSFGSGTKDTQYF*         | TCRBV07-04*01 | TCRBJ02-03*01 |
| CASSLAGLAGTDTQYF*        | TCRBV11-02*02 | TCRBJ02-03*01 | CASSFGSGTKDTQYF*         | TCRBV12       | TCRBJ02-03*01 |
| CASSVLNTGELFF*           | TCRBV06-06    | TCRBJ02-02*01 | CASSLAGLAGTDTQYF*        | TCRBV07-06*01 | TCRBJ02-03*01 |
| CAIHEGDSNTGELFF*         | TCRBV06-05*01 | TCRBJ02-02*01 | CASSLAGLAGTDTQYF*        | TCRBV07-03*01 | TCRBJ02-03*01 |
| CAIHEGDSNTGELFF*         | TCRBV10-02*01 | TCRBJ02-02*01 | CASSLIAGLSYEQYF*         | TCRBV11-02*02 | TCRBJ02-07*01 |
| CASRASNTYGYTF*           | TCRBV06-09*01 | TCRBJ01-02*01 | CASSLIAGLSYEQYF*         | TCRBV07-01*01 | TCRBJ02-07*01 |
| CASRASNTYGYTF*           | TCRBV06       | TCRBJ01-02*01 | CASSLIAGLSYEQYF*         | TCRBV07-06*01 | TCRBJ02-07*01 |
| CASRGQNTGELFF*           | TCRBV06-05*01 | TCRBJ02-02*01 | CASSQLRTGDEYEQYF*        | TCRBV13-01*01 | TCRBJ02-07*01 |
| CASRGQNTGELFF*           | TCRBV06-01*01 | TCRBJ02-02*01 | CASSSRTKAYEQYF*          | TCRBV03       | TCRBJ02-07*01 |
| CASRGQNTGELFF*           | TCRBV06-06    | TCRBJ02-02*01 | CASSSRTKAYEQYF*          | TCRBV03       | TCRBJ02-07*01 |
| CASSDTPDLNTEAFF*         | TCRBV06-01*01 | TCRBJ01-01*01 | CASSSRTKAYEQYF*          | TCRBV02-01*01 | TCRBJ02-07*01 |
| CCASSFGTSGGTTYNEQFF*     | TCRBV13-01*01 | TCRBJ02-01*01 | CASSSRTKAYEQYF*          | TCRBV02-01*01 | TCRBJ02-07*01 |
| CASSIQLFVRTEAFF*         | TCRBV19-01    | TCRBJ01-01*01 | CASSSRTKAYEQYF*          | TCRBV13-01*01 | TCRBJ02-07*01 |
| CASSLAGLAGTDTQYF*        | TCRBV07-09    | TCRBJ02-03*01 | CASSSRTKAYEQYF*          | TCRBV13-01*01 | TCRBJ02-07*01 |
| CASSLIAGLSYEQYF*         | TCRBV07-03*01 | TCRBJ02-07*01 | CASSVEDYTGELFF*          | TCRBV10-02*01 | TCRBJ02-02*01 |
| CASSRYGQGWEQYF           | TCRBV27-01*01 | TCRBJ02-07*01 | CASSVLNTGELFF*           | TCRBV06-05*01 | TCRBJ02-02*01 |
| CASSSRTKAYEQYF*          | TCRBV13-01*01 | TCRBJ02-07*01 | CASSVLNTGELFF*           | TCRBV06-05*01 | TCRBJ02-02*01 |
| CASSSRTKAYEQYF*          | TCRBV13-01*01 | TCRBJ02-07*01 | CASSVLNTGELFF*           | TCRBV06-09*01 | TCRBJ02-02*01 |
| CASSVEDYTGELFF*          | TCRBV03       | TCRBJ02-02*01 | CASSVLNTGELFF*           | TCRBV10-02*01 | TCRBJ02-02*01 |
| CASSVLNTGELFF*           | TCRBV09-01    | TCRBJ02-02*01 | CASSVLNTGELFF*           | TCRBV10-02*01 | TCRBJ02-02*01 |
| CASSVLNTGELFF*           | TCRBV06-01*01 | TCRBJ02-02*01 | CASSVLNTGELFF*           | TCRBV10-02*01 | TCRBJ02-02*01 |
| CASSVLNTGELFF*           | TCRBV06-01*01 | TCRBJ02-02*01 | CASSYQIGLSYEQYF*         | TCRBV06       | TCRBJ02-07*01 |
| CASSYQIGLSYEQYF*         | TCRBV06-05*01 | TCRBJ02-07*01 | CASTLGNPSTDTQYF*         | TCRBV06       | TCRBJ02-03*01 |
| CASREGYSNQPQHF           | TCRBV19-01    | TCRBJ01-05*01 | CATRDINTGELFF*           | TCRBV06-01*01 | TCRBJ02-02*01 |
| CASSGRDRGSEKLF           | TCRBV19-01    | TCRBJ01-04*01 |                          |               |               |
| CASSGQVATHARNTIYF        | TCRBV21-01*01 | TCRBJ01-03*01 | <b>w878</b>              |               |               |
| CASSHGRNLNEKLF           | TCRBV13-01*01 | TCRBJ01-04*01 | CASRGGASYNEQFF           | TCRBV28-01*01 | TCRBJ02-01*01 |
| CATSHSTVGYGTYF           | TCRBV10-03*01 | TCRBJ01-02*01 | CASSILLFSGNTIYF          | TCRBV19-01    | TCRBJ01-03*01 |
| CASSFDKSGSNTGELFF        | TCRBV28-01*01 | TCRBJ02-02*01 | CAIRSRDQNTGELFF          | TCRBV10-03*01 | TCRBJ02-02*01 |
| CASSLIIGRDPYEQYF         | TCRBV07-09    | TCRBJ02-07*01 | CASSQDARRSGNTIYF         | TCRBV14-01*01 | TCRBJ01-03*01 |
| CASSLVPSGSPVSAGELFF      | TCRBV11-02*02 | TCRBJ02-02*01 | CASSIQEGYSEQYF           | TCRBV19-01    | TCRBJ02-07*01 |
| CASSLWVAGYNEQFF          | TCRBV07-09    | TCRBJ02-01*01 | CASSPALATTSRANVLT        | TCRBV21-01*01 | TCRBJ02-06*01 |
| CSARLANSYEQYF            | TCRBV20       | TCRBJ02-07*01 | CASRTSNTYGYTF            | TCRBV06-05*01 | TCRBJ01-02*01 |
| CAISARDQNTGELFF*         | TCRBV10-03*01 | TCRBJ02-02*01 | CAIRAADQNTGELFF          | TCRBV10-03*01 | TCRBJ02-02*01 |

| CDR3                | TCRBV allele  | TCRBJ allele  |
|---------------------|---------------|---------------|
| <b>w878 cont'd</b>  |               |               |
| CASRQFLATPSDNEQFF   | TCRBV21-01*01 | TCRBJ02-01*01 |
| CASSLLRTSQETQYF     | TCRBV12       | TCRBJ02-05*01 |
| CASSIQEGYSEQYF      | TCRBV19-01    | TCRBJ02-05*01 |
| YASSDKSLGGVDTGELFF  | TCRBV26-01*01 | TCRBJ01-03*01 |
| <b>w1045</b>        |               |               |
| CASRTGSSYNEQFF      | TCRBV28-01*01 | TCRBJ02-01*01 |
| CASSTGEPGVYGYTF     | TCRBV06-05*01 | TCRBJ01-02*01 |
| CASTPGAGLKNEQFF     | TCRBV06-05*01 | TCRBJ02-01*01 |
| CASSTGEPGVYGYTF     | TCRBV06-01*01 | TCRBJ01-02*01 |
| CASSLDWRGNTIYF      | TCRBV07-02*01 | TCRBJ01-03*01 |
| CAIRAYGQNTGELFF     | TCRBV10-03*01 | TCRBJ02-02*01 |
| CASSIELRSYEQYF      | TCRBV19-01    | TCRBJ02-07*01 |
| CASTTGEGYEYQYF      | TCRBV06-05*01 | TCRBJ02-07*01 |
| CASSSGASLLNEQFF     | TCRBV06-05*01 | TCRBJ02-01*01 |
| <b>w1051</b>        |               |               |
| CSARTGYNEQFF        | TCRBV20       | TCRBJ02-01*01 |
| CASILIAGGYNEQFF     | TCRBV02-01*01 | TCRBJ02-01*01 |
| CASILIAGAYNEQFF     | TCRBV02-01*01 | TCRBJ02-01*01 |
| CASSPEGSGGYTF       | TCRBV18-01*01 | TCRBJ01-02*01 |
| CASRCLVLQQSRANVLT   | TCRBV21-01*01 | TCRBJ02-06*01 |
| CASSADRGWWSGNPQHF   | TCRBV12       | TCRBJ01-05*01 |
| <b>w1116 (PBMC)</b> |               |               |
| CAIRTLDMNTGELFF     | TCRBV10-03*01 | TCRBJ02-02*01 |
| CASSLNIAHSDNEQFF    | TCRBV21-01*01 | TCRBJ02-01*01 |
| CASKRLAGEGTGELFF    | TCRBV06       | TCRBJ02-02*01 |
| CAISTLDMNTGELFF     | TCRBV10-03*01 | TCRBJ02-02*01 |
| CAIRTLDMNTGELFF     | unresolved    | TCRBJ02-02*01 |
| CASSSSTEILWLHL      | TCRBV28-01*01 | TCRBJ01-02*01 |
| <b>w1116 (TIL)</b>  |               |               |
| CAIRTLDMNTGELFF     | TCRBV10-03*01 | TCRBJ02-02*01 |
| CASSGPDGDNEQFF      | TCRBV09-01    | TCRBJ02-01*01 |
| CAIRTLDMNTGELFF*    | TCRBV10-03*01 | TCRBJ02-02*01 |
| CASSYPDVYEYQYF*     | TCRBV06       | TCRBJ02-07*01 |
| CAIRTLDMNTGELFF*    | TCRBV10-03*01 | TCRBJ02-02*01 |
| CAIRIRDQNTGELFF     | TCRBV10-03*01 | TCRBJ02-02*01 |
| CAIRTLDMNTGELFF*    | TCRBV06-05*01 | TCRBJ02-02*01 |
| CASSYPDVYEYQYF*     | TCRBV06       | TCRBJ02-05*01 |
| CASSETGTWDEYQYF     | TCRBV10-02*01 | TCRBJ02-07*01 |
| CAIRTLDMNTGELFF*    | TCRBV10-03*01 | TCRBJ02-02*01 |
| CAIRTLDMNTGELFF     | TCRBV10-03*01 | TCRBJ02-02*01 |
| CAIRTLDMNTGELFF*    | TCRBV06-06    | TCRBJ02-02*01 |
| CASSSSTESYGYTF      | TCRBV28-01*01 | TCRBJ01-02*01 |
| CAIRTLDMNTGELFF*    | TCRBV06-01*01 | TCRBJ02-02*01 |
| CASSGPDGDNEQFF      | TCRBV09-01    | TCRBJ02-01*01 |
| CASSERHLHARNTIYF    | TCRBV03       | TCRBJ01-03*01 |
| CASRSLIATLLDEYQYF   | TCRBV21-01*01 | TCRBJ02-07*01 |
| CASSSTLKSQSRANVLT   | TCRBV19-01    | TCRBJ02-06*01 |
| CAISEPSGAQHF        | TCRBV10-03*01 | TCRBJ01-05*01 |
| CASSEGKTKSQSRANVLT  | TCRBV19-01    | TCRBJ02-06*01 |
| CASSLGNTEAFF        | TCRBV11-02*02 | TCRBJ01-01*01 |
| CASSLVSSGGEAFF      | TCRBV07-09    | TCRBJ01-01*01 |
| CAIRTLDMNTGDLFF     | TCRBV10-03*01 | TCRBJ02-02*01 |
| CASKKLD RPAPNSPLHF  | TCRBV03       | TCRBJ01-06*01 |
| CASSGPDGGNEQFF*     | TCRBV09-01    | TCRBJ02-01*01 |
| CASSGPDGGNEQFF*     | TCRBV09-01    | TCRBJ02-01*01 |
| CASSSQRKSYYGYTF     | TCRBV28-01*01 | TCRBJ01-02*01 |
| CASSSRKSYYGYTF      | TCRBV28-01*01 | TCRBJ01-02*01 |
| CATSDPLAASYEQYF     | TCRBV24       | TCRBJ02-07*01 |

\*denotes non-unique CDR3s within a patient, encoded by a unique *TRB* nucleotide sequence and/or unique TCRBV or TCRBJ.
